# Supplementary material for: Urinary tract infections among pregnant women in rural West Amhara, Ethiopia: Prevalence, bacterial etiology, risk factors, and antimicrobial resistance patterns
Source: Research Square preprint supplement (doi:10.21203/rs.3.rs-5737078/v1), 2025-01-09
Supplement: Supplementary file 1 [file 5d15f37a8391aea948b2191b.docx]

**Urinary tract infections among pregnant women in rural West Amhara, Ethiopia: Prevalence, bacterial etiology, risk factors, and antimicrobial resistance patterns**

Mulatu Melese Derebe, MSc1,2, Unmesha Roy Paladhi, PhD, MPH3, Firehiwot Workneh, PhD4, Abaineh Munshea, PhD1, Gizachew Yismaw, PhD2, Kalkidan Yibeltal, MD, MPH5, Nebiyou Fasil, PhD, MPH6, Alemayehu Worku, PhD4, Tsehaynesh Gebreyesus, MSc2, Wudu Tafere, MSc2, Alem Tsega, MSc2, Parul Christian, PhD7, Rose L. Molina, MD, MPH,8 Blair J. Wylie, MD8, Yemane Berhane, MD, MPH, PhD4*, Anne CC Lee, MD, MPH3*

1Health Biotechnology Division, Institute of Biotechnology, Bahir Dar University, Bahir Dar, Ethiopia

2Amhara Public Health Institute, Bahir Dar, Ethiopia

3Global Alliance for Infant and Maternal Health, Warren Alpert Medical School, Department of Pediatrics, Brown University, Providence, RI, USA

4Department of Epidemiology and Biostatistics, Addis Continental Institute of Public Health, Addis Ababa, Ethiopia

5Department of Reproductive Health and Population, Addis Continental Institute of Public Health, Addis Ababa, Ethiopia

6Department of Global Health and Health Policy, Addis Continental Institute of Public Health, Addis Ababa, Ethiopia

7Department of Human Development, Teachers College, Columbia University, New York, USA

8Beth Israel Deaconess Medical Center, Boston, MA

*Co-senior authors

**Supplementary documents:**

**Supplementary Table S1:** The etiology of uropathogens isolated among symptomatic and asymptomatic pregnant women diagnosed with UTIs in rural Amhara, Ethiopia, 2020-2022.

| Bacterial Isolates | Asymptomatic  N= 12 | Symptomatic  N=9 | Total  N=21 |
| --- | --- | --- | --- |
| *Escherichia coli* | 5 (41.7%) | 7 (58.3%) | 12 (57.1%) |
| *Enterococcus faecalis* | 3 (100.0%) | 0 (0.0) | 3 (1.3%) |
| *Klebsiella pneumoniae* | 2 (66.7%) | 1 (33.3%) | 3 (1.3%) |
| *Staphylococcus aureus* | 0 (0.0) | 1 (100.0%) | 1 (4.8%) |
| *Staphylococcus saprophyticus* | 1 (100.0%) | 0 (100.0%) | 1 (4.8%) |
| *Other streptococcus species* | 1 (100.0%) | 0 (0.0) | 1 (4.8%) |
| % | 12 (57.1%) | 9 (42.9%) | 21 (100.0%) |

**Supplementary Figure S1**. Antimicrobial susceptibility profiles of UTI uropathogens (n=21) from urine culture among pregnant women attending ANC in rural Amhara region, Ethiopia, 2020-2022.

**
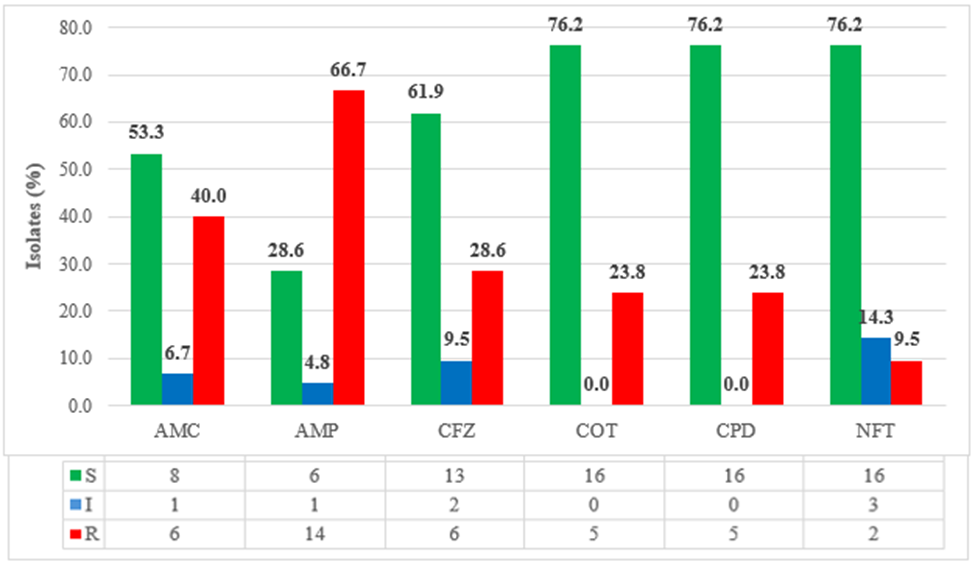
**

Abbreviations: AMC- amoxacillin-clavilanic acid; AMP- ampicillin; CFZ- cefazolin; COT- cotrimoxazole; CPD- cefpodoxime; NFT- nitrofurantoin.
